# Supplementary material for: Gut Microbiota-Mediated Pharmacokinetic Drug–Drug Interactions between Mycophenolic Acid and Trimethoprim-Sulfamethoxazole in Humans
Source: MDPI journal article supplement (doi:10.3390/pharmaceutics15061734), 2023-06-14
Supplement: s1 [file s1]

## Supplementary Figure S1

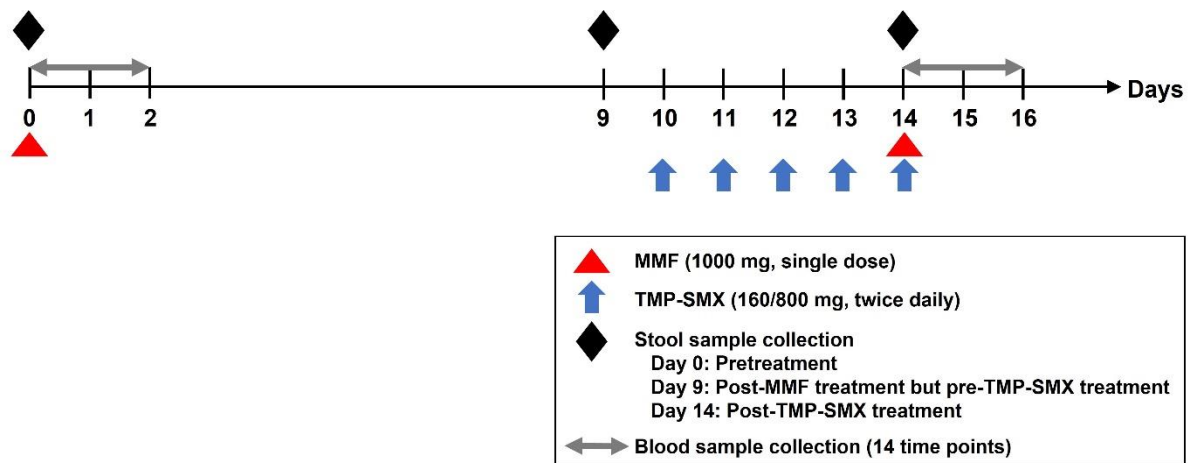

**Figure S1. Study schema.** Days of administration of MMF, TMP-SMX, as well as blood and stool sample collections from the study participants, are presented.
