# Supplementary material for: Gut Microbiota-Mediated Pharmacokinetic Drug–Drug Interactions between Mycophenolic Acid and Trimethoprim-Sulfamethoxazole in Humans
Source: Pharmaceutics. 2023 Jun 14;15(6):1734. doi: 10.3390/pharmaceutics15061734 (PMC10304707; doi:10.3390/pharmaceutics15061734)
Supplement: Supplementary file 1 [file pharmaceutics-15-01734-s001.zip › Table S1.xlsx]

## Sheet: Table S1
Table S1. Top 20 most abundant bacterial genera in gut microbiota between pretreatment and post-TMP-SMX treatment groups
Rank	Pretreatment (Day 0)		Post-TMP-SMX treatment (Day 14)
	Genera	Relative abundance (%)	Genera	Relative abundance (%)
1	p_Bacteroidota;c_Bacteroidia;o_Bacteroidales;f_Bacteroidaceae;g_Bacteroides	18.03 ± 11.24	p_Bacteroidota;c_Bacteroidia;o_Bacteroidales;f_Prevotellaceae;g_Prevotella	12.54 ± 11.35
2	p_Bacteroidota;c_Bacteroidia;o_Bacteroidales;f_Prevotellaceae;g_Prevotella	10.95 ± 9.02	p_Bacteroidota;c_Bacteroidia;o_Bacteroidales;f_Bacteroidaceae;g_Bacteroides	11.50 ± 5.79
3	p_Firmicutes;c_Clostridia;o_Oscillospirales;f_Ruminococcaceae;g_Faecalibacterium	4.83 ± 3.23	p_Firmicutes;c_Clostridia;o_Oscillospirales;f_Ruminococcaceae;g_Faecalibacterium	9.26 ± 6.35
4	p_Firmicutes;c_Clostridia;o_Lachnospirales;f_Lachnospiraceae;g_Agathobacter	3.28 ± 2.86	p_Firmicutes;c_Clostridia;o_Clostridia_UCG-014;f_Clostridia_UCG-014;g_Clostridia_UCG-014	4.88 ± 7.86
5	p_Bacteroidota;c_Bacteroidia;o_Bacteroidales;f_Tannerellaceae;g_Parabacteroides	3.02 ± 2.42	p_Bacteroidota;c_Bacteroidia;o_Bacteroidales;f_Tannerellaceae;g_Parabacteroides	4.55 ± 4.24
6	p_Actinobacteriota;c_Actinobacteria;o_Bifidobacteriales;f_Bifidobacteriaceae;g_Bifidobacterium	2.81 ± 4.52	p_Actinobacteriota;c_Actinobacteria;o_Bifidobacteriales;f_Bifidobacteriaceae;g_Bifidobacterium	4.04 ± 4.98
7	p_Firmicutes;c_Negativicutes;o_Veillonellales-Selenomonadales;f_Selenomonadaceae;g_Megamonas	2.28 ± 2.30	p_Firmicutes;c_Negativicutes;o_Veillonellales-Selenomonadales;f_Selenomonadaceae;g_Megamonas	3.16 ± 3.01
8	p_Bacteroidota;c_Bacteroidia;o_Bacteroidales;f_Muribaculaceae;g_Muribaculaceae	2.19 ± 2.22	p_Firmicutes;c_Clostridia;o_Lachnospirales;f_Lachnospiraceae;g_Agathobacter	2.92 ± 2.28
9	p_Proteobacteria;c_Gammaproteobacteria;o_Burkholderiales;f_Sutterellaceae;g_Sutterella	2.15 ± 1.80	p_Proteobacteria;c_Gammaproteobacteria;o_Burkholderiales;f_Sutterellaceae;g_Sutterella	2.01 ± 1.34
10	p_Bacteroidota;c_Bacteroidia;o_Bacteroidales;f_Rikenellaceae;g_Alistipes	1.95 ± 1.08	p_Bacteroidota;c_Bacteroidia;o_Bacteroidales;f_Muribaculaceae;g_Muribaculaceae	2.01 ± 2.51
11	p_Firmicutes;c_Clostridia;o_Lachnospirales;f_Lachnospiraceae;g_	1.77 ± 0.76	p_Firmicutes;c_Clostridia;o_Lachnospirales;f_Lachnospiraceae;g_	1.94 ± 1.05
12	p_Firmicutes;c_Clostridia;o_Clostridia_UCG-014;f_Clostridia_UCG-014;g_Clostridia_UCG-014	1.75 ± 2.52	p_Firmicutes;c_Clostridia;o_Lachnospirales;f_Lachnospiraceae;g_Blautia	1.68 ± 0.48
13	p_Firmicutes;c_Clostridia;o_Lachnospirales;f_Lachnospiraceae;g_Blautia	1.50 ± 0.94	p_Firmicutes;c_Clostridia;o_Oscillospirales;f_Oscillospiraceae;g_UCG-002	1.54 ± 0.85
14	p_Firmicutes;c_Clostridia;o_Lachnospirales;f_Lachnospiraceae;g_Roseburia	1.42 ± 0.73	p_Firmicutes;c_Clostridia;o_Oscillospirales;f_Ruminococcaceae;g_Subdoligranulum	1.51 ± 0.96
15	p_Firmicutes;c_Clostridia;o_Lachnospirales;f_Lachnospiraceae;g_Lachnospira	1.12 ± 0.76	p_Firmicutes;c_Clostridia;o_Oscillospirales;f_Ruminococcaceae;g_Ruminococcus	1.41 ± 0.91
16	p_Firmicutes;c_Clostridia;o_Oscillospirales;f_[Eubacterium]_coprostanoligenes_group;g_[Eubacterium]_coprostanoligenes_group	1.09 ± 0.65	p_Firmicutes;c_Clostridia;o_Lachnospirales;f_Lachnospiraceae;g_Roseburia	1.32 ± 0.55
17	p_Firmicutes;c_Clostridia;o_Lachnospirales;f_Lachnospiraceae;g_[Eubacterium]_eligens_group	1.03 ± 0.72	p_Firmicutes;c_Clostridia;o_Lachnospirales;f_Lachnospiraceae;g_[Eubacterium]_eligens_group	1.29 ± 0.69
18	p_Actinobacteriota;c_Coriobacteriia;o_Coriobacteriales;f_Coriobacteriaceae;g_Collinsella	1.00 ± 1.00	p_Firmicutes;c_Clostridia;o_Oscillospirales;f_[Eubacterium]_coprostanoligenes_group;g_[Eubacterium]_coprostanoligenes_group	1.25 ± 0.65
19	p_Firmicutes;c_Clostridia;o_Lachnospirales;f_Lachnospiraceae;g_Lachnospiraceae_NK4A136_group	0.93 ± 0.82	p_Bacteroidota;c_Bacteroidia;o_Bacteroidales;f_Rikenellaceae;g_Alistipes	1.23 ± 0.70
20	p_Firmicutes;c_Clostridia;o_Oscillospirales;f_Ruminococcaceae;g_Subdoligranulum	0.91 ± 0.76	p_Actinobacteriota;c_Coriobacteriia;o_Coriobacteriales;f_Coriobacteriaceae;g_Collinsella	1.11 ± 1.46
Abbreviations: p, phylum; c, class; o, order; f, family; g, genus; TMP-SMX, trimethoprim-sulfamethoxazole
