# Supplementary material for: Gut Microbiota-Mediated Pharmacokinetic Drug–Drug Interactions between Mycophenolic Acid and Trimethoprim-Sulfamethoxazole in Humans
Source: Pharmaceutics. 2023 Jun 14;15(6):1734. doi: 10.3390/pharmaceutics15061734 (PMC10304707; doi:10.3390/pharmaceutics15061734)
Supplement: Supplementary file 1 [file pharmaceutics-15-01734-s001.zip › Table S2.xlsx]

## Sheet: Table S2
Table S2. Abundance of Bacteroides species identified from the microbiome at pretreatment and post-TMP-SMX treatment
No.	Bacteroides species	Relative abundance (%)a		p-value
		Pretreatment (Day 0)	Post-TMP-SMX treatment (Day 14)
1	Bacteroides plebeius	6.23 ± 4.91	2.97 ± 2.14	0.0138442
2	Bacteroides stercoris	2.64 ± 2.92	1.41 ± 1.56	0.142127
3	Bacteroides vulgatus	2.09 ± 1.76	1.56 ± 1.36	0.197278
4	Bacteroides_unknown species	1.32 ± 1.13	1.37 ± 1.72	0.930943
5	Bacteroides uniformis	0.95 ± 0.77	0.73 ± 0.71	0.388128
6	Bacteroides massiliensis	0.88 ± 0.91	0.71 ± 0.60	0.448917
7	Bacteroides coprocola	0.59 ± 1.32	0.42 ± 0.45	0.643313
8	Bacteroides sartorii	0.39 ± 0.66	0.41 ± 0.48	0.939956
9	Bacteroides coprophilus	0.67 ± 1.14	0.30 ± 0.31	0.182974
10	Bacteroides dorei	0.67 ± 0.74	0.39 ± 0.40	0.245807
11	Bacteroides fragilis	0.35 ± 0.46	0.33 ± 0.31	0.897557
12	Bacteroides caccae	0.46 ± 0.35	0.28 ± 0.33	0.180999
13	Bacteroides ovatus	0.35 ± 0.31	0.16 ± 0.16	0.08413
14	Bacteroides thetaiotaomicron	0.23 ± 0.20	0.20 ± 0.29	0.725215
15	Bacteroides eggerthii	0.07 ± 0.08	0.18 ± 0.40	0.223433
16	Bacteroides salyersiae	0.02 ± 0.03	0.02 ± 0.02	0.703362
17	Bacteroides cellulosilyticus	0.03 ± 0.02	0.02 ± 0.03	0.324452
18	Bacteroidaceae bacterium	0.02 ± 0.02	0.00 ± 0.01	0.0176163
19	Bacteroides intestinalis	0.02 ± 0.03	0.00 ± 0.00	0.0190699
20	Bacteroides clarus	0.01 ± 0.02	0.02 ± 0.02	0.679019
21	Bacteroides nordii	0.02 ± 0.01	0.01 ± 0.01	0.0249701
22	Bacteroides fluxus	0.00 ± 0.01	0.01 ± 0.02	0.0708843
23	Bacteroides acidifaciens	0.01 ± 0.02	0.01 ± 0.02	0.754129
24	Bacteroides_uncultured species	0.00 ± 0.01	0.00 ± 0.01	0.637061
25	Bacteroides_bacterium NLAE-zl-P177	0.00 ± 0.00	0.00 ± 0.00	0.33317
aAverage relative abundance of each Bacteroides species from total sequence reads across all 16 specimens at pretreatment or post-TMP-SMX treatment groups
Abbreviations: TMP-SMX, trimethoprim-sulfamethoxazole
