# Supplementary material for: Gut Microbiota-Mediated Pharmacokinetic Drug–Drug Interactions between Mycophenolic Acid and Trimethoprim-Sulfamethoxazole in Humans
Source: Pharmaceutics. 2023 Jun 14;15(6):1734. doi: 10.3390/pharmaceutics15061734 (PMC10304707; doi:10.3390/pharmaceutics15061734)
Supplement: Supplementary file 1 [file pharmaceutics-15-01734-s001.zip › Table S3.xlsx]

## Sheet: Table S3_Day 0
Table S3. Co-occurrence analysis of the highly abundant genera in gut microbiota at pretreatment using Spearman correlation
Pretreatment (Day 0)	Genera	Spearman's Correlation	g_Bacteroides	g_Prevotella	g_Faecalibacterium	g_Agathobacter	g_Parabacteroides	g_Bifidobacterium	g_Megamonas	g_Muribaculaceae	g_Sutterella	g_Alistipes	f_Lachnospiraceae;g_	g_Clostridia UCG-014	g_Blautia	g_Roseburia	g_Lachnospira	g_[Eubacterium] coprostanoligenes group	g_[Eubacterium] eligenes group	g_Collinsella	g_Lachnospiraceae NK4A136	g_Subdoligranulum
	g_Bacteroides	Correlation coefficient	1	-0.0264706	0.0382353	0.447059	0.382353	0.482353	0.0970588	0.0647059	-0.220588	.630**	.500*	0.0235294	.709**	.538*	0.367647	-0.0617647	0.170588	0.382353	0.0411765	0
		p-value		0.922481	0.888198	0.0825369	0.143859	0.058459	0.720651	0.811821	0.411666	0.00892241	0.0485803	0.931074	0.00211168	0.0314932	0.161232	0.820242	0.52761	0.143859	0.879654	1
	g_Prevotella	Correlation coefficient	-0.0264706	1	0.352941	.562*	0.0882353	-0.111765	0.414706	0.302941	.550*	0.139809	0.435294	.594*	0.211765	0.452941	0.0882353	0.420588	0.117647	-0.123529	0.402941	0.305882
		p-value	0.922481		0.179959	0.023537	0.745222	0.680274	0.110229	0.254067	0.027294	0.605562	0.0919524	0.0152324	0.431083	0.0780987	0.745222	0.104768	0.664341	0.648542	0.121746	0.249254
	g_Faecalibacterium	Correlation coefficient	0.0382353	0.352941	1	0.235294	0.376471	0.420588	0.482353	0.361765	.741**	0.373804	-0.0441176	0.155882	0.0882353	0.467647	0.25	.538*	0.488235	0.258824	0.464706	.888**
		p-value	0.888198	0.179959		0.380356	0.150648	0.104768	0.058459	0.168559	0.00101847	0.153795	0.871122	0.564282	0.745222	0.0677609	0.350391	0.0314932	0.055015	0.333072	0.0697437	4.32625e-06
	g_Agathobacter	Correlation coefficient	0.447059	.562*	0.235294	1	0.0205882	0.0235294	0.0411765	.547*	0.158824	0.470935	.653**	0.385294	0.264706	.691**	0.179412	.503*	-0.0441176	-0.111765	.603*	0.214706
		p-value	0.0825369	0.023537	0.380356		0.939674	0.931074	0.879654	0.0283011	0.556861	0.0655935	0.00610205	0.140544	0.321804	0.00302472	0.50614	0.0470631	0.871122	0.680274	0.0134241	0.424559
	g_Parabacteroides	Correlation coefficient	0.382353	0.0882353	0.376471	0.0205882	1	0.455882	0.352941	0.188235	0.294118	0.354673	-0.0441176	0.126471	.603*	0.111765	0.458824	0.25	0.417647	.529*	0.144118	.594*
		p-value	0.143859	0.745222	0.150648	0.939674		0.0759455	0.179959	0.485087	0.268847	0.177683	0.871122	0.640694	0.0134241	0.680274	0.0738355	0.350391	0.107474	0.034952	0.594378	0.0152324
	g_Bifidobacterium	Correlation coefficient	0.482353	-0.111765	0.420588	0.0235294	0.455882	1	.538*	0	0.191176	0.148639	-0.0735294	-0.326471	0.305882	0.0529412	0.238235	-0.126471	0.114706	.718**	-0.129412	0.397059
		p-value	0.058459	0.680274	0.104768	0.931074	0.0759455		0.0314932	1	0.478164	0.582736	0.786679	0.217159	0.249254	0.84561	0.374254	0.640694	0.672291	0.00174754	0.632882	0.127806
	g_Megamonas	Correlation coefficient	0.0970588	0.414706	0.482353	0.0411765	0.352941	.538*	1	0.0735294	.538*	-0.155997	0.129412	0.170588	0.220588	-0.0323529	.544*	0.0823529	0.447059	.600*	0.105882	0.467647
		p-value	0.720651	0.110229	0.058459	0.879654	0.179959	0.0314932		0.786679	0.0314932	0.563992	0.632882	0.52761	0.411666	0.90532	0.0293363	0.761733	0.0825369	0.0140071	0.696334	0.0677609
	g_Muribaculaceae	Correlation coefficient	0.0647059	0.302941	0.361765	.547*	0.188235	0	0.0735294	1	.544*	0.295806	0.414706	.629**	-0.0235294	0.288235	0.270588	.826**	0.344118	-0.0588235	.891**	0.429412
		p-value	0.811821	0.254067	0.168559	0.0283011	0.485087	1	0.786679		0.0293363	0.265979	0.110229	0.00898809	0.931074	0.278984	0.310761	7.92355e-05	0.191856	0.828681	3.61865e-06	0.0969365
	g_Sutterella	Correlation coefficient	-0.220588	.550*	.741**	0.158824	0.294118	0.191176	.538*	.544*	1	0.0765269	0.0264706	0.441176	-0.155882	0.226471	0.155882	.550*	0.414706	0.211765	.509*	.718**
		p-value	0.411666	0.027294	0.00101847	0.556861	0.268847	0.478164	0.0314932	0.0293363		0.778182	0.922481	0.0871536	0.564282	0.398983	0.564282	0.027294	0.110229	0.431083	0.0441352	0.00174754
	g_Alistipes	Correlation coefficient	.630**	0.139809	0.373804	0.470935	0.354673	0.148639	-0.155997	0.295806	0.0765269	1	0.303164	0.233996	.628**	.648**	0.163355	0.314938	0.232524	0.0691685	0.420898	0.410596
		p-value	0.00892241	0.605562	0.153795	0.0655935	0.177683	0.582736	0.563992	0.265979	0.778182		0.2537	0.383067	0.00913235	0.00668835	0.545511	0.234795	0.386152	0.799082	0.104485	0.114162
	f_Lachnospiraceae;g_	Correlation coefficient	.500*	0.435294	-0.0441176	.653**	-0.0441176	-0.0735294	0.129412	0.414706	0.0264706	0.303164	1	.585*	0.444118	.603*	0.444118	0.202941	0.258824	-0.223529	.526*	-0.0970588
		p-value	0.0485803	0.0919524	0.871122	0.00610205	0.871122	0.786679	0.632882	0.110229	0.922481	0.2537		0.0172253	0.0848227	0.0134241	0.0848227	0.450961	0.333072	0.405298	0.0361665	0.720651
	g_Clostridia UCG-014	Correlation coefficient	0.0235294	.594*	0.155882	0.385294	0.126471	-0.326471	0.170588	.629**	0.441176	0.233996	.585*	1	0.273529	0.311765	.503*	.650**	.615*	-0.167647	.694**	0.141176
		p-value	0.931074	0.0152324	0.564282	0.140544	0.640694	0.217159	0.52761	0.00898809	0.0871536	0.383067	0.0172253		0.305323	0.2398	0.0470631	0.00641571	0.0112795	0.534857	0.00285371	0.602003
	g_Blautia	Correlation coefficient	.709**	0.211765	0.0882353	0.264706	.603*	0.305882	0.220588	-0.0235294	-0.155882	.628**	0.444118	0.273529	1	0.394118	.524*	0.0176471	0.355882	0.241176	0.135294	0.194118
		p-value	0.00211168	0.431083	0.745222	0.321804	0.0134241	0.249254	0.411666	0.931074	0.564282	0.00913235	0.0848227	0.305323		0.130913	0.0374126	0.94828	0.176104	0.368207	0.617367	0.47129
	g_Roseburia	Correlation coefficient	.538*	0.452941	0.467647	.691**	0.111765	0.0529412	-0.0323529	0.288235	0.226471	.648**	.603*	0.311765	0.394118	1	0.135294	0.35	0.197059	-0.244118	0.467647	0.279412
		p-value	0.0314932	0.0780987	0.0677609	0.00302472	0.680274	0.84561	0.90532	0.278984	0.398983	0.00668835	0.0134241	0.2398	0.130913		0.617367	0.183869	0.464464	0.362213	0.0677609	0.294618
	g_Lachnospira	Correlation coefficient	0.367647	0.0882353	0.25	0.179412	0.458824	0.238235	.544*	0.270588	0.155882	0.163355	0.444118	.503*	.524*	0.135294	1	0.264706	.812**	0.385294	0.385294	0.282353
		p-value	0.161232	0.745222	0.350391	0.50614	0.0738355	0.374254	0.0293363	0.310761	0.564282	0.545511	0.0848227	0.0470631	0.0374126	0.617367		0.321804	0.000134322	0.140544	0.140544	0.28935
	g_[Eubacterium] coprostanoligenes group	Correlation coefficient	-0.0617647	0.420588	.538*	.503*	0.25	-0.126471	0.0823529	.826**	.550*	0.314938	0.202941	.650**	0.0176471	0.35	0.264706	1	0.45	-0.0647059	.829**	.526*
		p-value	0.820242	0.104768	0.0314932	0.0470631	0.350391	0.640694	0.761733	7.92355e-05	0.027294	0.234795	0.450961	0.00641571	0.94828	0.183869	0.321804		0.0802957	0.811821	7.08845e-05	0.0361665
	g_[Eubacterium] eligenes group	Correlation coefficient	0.170588	0.117647	0.488235	-0.0441176	0.417647	0.114706	0.447059	0.344118	0.414706	0.232524	0.258824	.615*	0.355882	0.197059	.812**	0.45	1	0.282353	0.435294	0.405882
		p-value	0.52761	0.664341	0.055015	0.871122	0.107474	0.672291	0.0825369	0.191856	0.110229	0.386152	0.333072	0.0112795	0.176104	0.464464	0.000134322	0.0802957		0.28935	0.0919524	0.118792
	g_Collinsella	Correlation coefficient	0.382353	-0.123529	0.258824	-0.111765	.529*	.718**	.600*	-0.0588235	0.211765	0.0691685	-0.223529	-0.167647	0.241176	-0.244118	0.385294	-0.0647059	0.282353	1	-0.241176	0.326471
		p-value	0.143859	0.648542	0.333072	0.680274	0.034952	0.00174754	0.0140071	0.828681	0.431083	0.799082	0.405298	0.534857	0.368207	0.362213	0.140544	0.811821	0.28935		0.368207	0.217159
	g_Lachnospiraceae NK4A136	Correlation coefficient	0.0411765	0.402941	0.464706	.603*	0.144118	-0.129412	0.105882	.891**	.509*	0.420898	.526*	.694**	0.135294	0.467647	0.385294	.829**	0.435294	-0.241176	1	.512*
		p-value	0.879654	0.121746	0.0697437	0.0134241	0.594378	0.632882	0.696334	3.61865e-06	0.0441352	0.104485	0.0361665	0.00285371	0.617367	0.0677609	0.140544	7.08845e-05	0.0919524	0.368207		0.0427234
	g_Subdoligranulum	Correlation coefficient	0	0.305882	.888**	0.214706	.594*	0.397059	0.467647	0.429412	.718**	0.410596	-0.0970588	0.141176	0.194118	0.279412	0.282353	.526*	0.405882	0.326471	.512*	1
		p-value	1	0.249254	4.32625e-06	0.424559	0.0152324	0.127806	0.0677609	0.0969365	0.00174754	0.114162	0.720651	0.602003	0.47129	0.294618	0.28935	0.0361665	0.118792	0.217159	0.0427234
	*, Correlation is significant at the 0.05 level (2-tailed).
	**, Correlation is significant at the 0.01 level (2-tailed).
	***, Correlation is significant at the 0.001 level (2-tailed).
	Abbreviations: g, genus
