# Supplementary material for: Gut Microbiota-Mediated Pharmacokinetic Drug–Drug Interactions between Mycophenolic Acid and Trimethoprim-Sulfamethoxazole in Humans
Source: Pharmaceutics. 2023 Jun 14;15(6):1734. doi: 10.3390/pharmaceutics15061734 (PMC10304707; doi:10.3390/pharmaceutics15061734)
Supplement: Supplementary file 1 [file pharmaceutics-15-01734-s001.zip › Table S4.xlsx]

## Sheet: Table S4_Day 14
Table S4. Co-occurrence analysis of the highly abundant genera in gut microbiota at post-TMP-SMX treatment using Spearman correlation
Post-TMP-SMX treatment (Day 14)	Genera	Spearman's Correlation	g_Prevotella	g_Bacteroides	g_Faecalibacterium	g_Clostridia UCG-014	g_Parabacteroides	g_Bifidobacterium	g_Megamonas	g_Agathobacter	g_Sutterella	g_Muribaculaceae	f_Lachnospiraceae;g_	g_Blautia	f_Oscillospiraceae;g_UCG-002	g_Subdoligranulum	g_Ruminococcus	g_Roseburia	g_[Eubacterium] eligenes group	g_[Eubacterium] coprostanoligenes group	g_Alistipes	g_Collinsella
	g_Prevotella	Correlation coefficient	1	-.732**	0.373529	-.615*	-0.0382353	-0.0352941	-0.147059	-0.0352941	0.302941	-.615*	-.641**	-0.370588	0.455882	0.255882	-0.2	-0.117647	0.2	0	-0.326471	-0.388235
		p-value		0.00125496	0.154122	0.0112795	0.888198	0.896753	0.586793	0.896753	0.254067	0.0112795	0.00743442	0.15765	0.0759455	0.33879	0.457688	0.664341	0.457688	1	0.217159	0.137282
	g_Bacteroides	Correlation coefficient	-.732**	1	-0.379412	.544*	-0.367647	0.126471	0.185294	0.0647059	-0.482353	.515*	.503*	0.144118	-.615*	-0.441176	0.179412	0.138235	-0.1	-0.232353	0.435294	0.291176
		p-value	0.00125496		0.147227	0.0293363	0.161232	0.640694	0.492057	0.811821	0.058459	0.0413458	0.0470631	0.594378	0.0112795	0.0871536	0.50614	0.609666	0.712516	0.386511	0.0919524	0.273887
	g_Faecalibacterium	Correlation coefficient	0.373529	-0.379412	1	-.853***	.565*	0.238235	-0.188235	-.503*	0.176471	-.779***	-.597*	-0.102941	.606*	0.479412	0.0558824	-0.0147059	.744**	0.135294	-0.255882	-0.270588
		p-value	0.154122	0.147227		2.67907e-05	0.0226632	0.374254	0.485087	0.0470631	0.513251	0.00037168	0.0146097	0.70441	0.0128603	0.0602393	0.837137	0.956892	0.000948283	0.617367	0.33879	0.310761
	g_Clostridia UCG-014	Correlation coefficient	-.615*	.544*	-.853***	1	-0.376471	-0.267647	0.161765	0.314706	-0.285294	.888***	.809***	0.188235	-.759**	-.503*	0.214706	0.0676471	-0.494118	-0.0558824	0.164706	0.170588
		p-value	0.0112795	0.0293363	2.67907e-05		0.150648	0.316254	0.549483	0.235158	0.284139	4.32625e-06	0.000148476	0.485087	0.00065403	0.0470631	0.424559	0.80342	0.0517234	0.837137	0.542148	0.52761
	g_Parabacteroides	Correlation coefficient	-0.0382353	-0.367647	.565*	-0.376471	1	-0.0588235	0.194118	-0.214706	0.0558824	-0.297059	-0.129412	.553*	.565*	0.467647	0.102941	-0.0117647	0.405882	0.455882	-0.120588	-0.15
		p-value	0.888198	0.161232	0.0226632	0.150648		0.828681	0.47129	0.424559	0.837137	0.263863	0.632882	0.0263145	0.0226632	0.0677609	0.70441	0.965508	0.118792	0.0759455	0.656425	0.579249
	g_Bifidobacterium	Correlation coefficient	-0.0352941	0.126471	0.238235	-0.267647	-0.0588235	1	0.182353	0.379412	0.429412	-0.141176	-0.0382353	-0.105882	0.229412	.585*	-0.00882353	0.361765	0.214706	0.176471	.571*	.644**
		p-value	0.896753	0.640694	0.374254	0.316254	0.828681		0.499075	0.147227	0.0969365	0.602003	0.888198	0.696334	0.39272	0.0172253	0.974128	0.168559	0.424559	0.513251	0.0209907	0.00708152
	g_Megamonas	Correlation coefficient	-0.147059	0.185294	-0.188235	0.161765	0.194118	0.182353	1	.700**	-0.208824	0.191176	0.347059	0.452941	-0.15	0.00294118	-0.0882353	-0.0911765	-0.232353	0.1	0.473529	0.270588
		p-value	0.586793	0.492057	0.485087	0.549483	0.47129	0.499075		0.00253509	0.437659	0.478164	0.187834	0.0780987	0.579249	0.991375	0.745222	0.737005	0.386511	0.712516	0.0639191	0.310761
	g_Agathobacter	Correlation coefficient	-0.0352941	0.0647059	-.503*	0.314706	-0.214706	0.379412	.700**	1	0.152941	0.394118	0.447059	0.167647	-0.132353	0.117647	-0.258824	0.247059	-0.402941	0.164706	0.494118	0.497059
		p-value	0.896753	0.811821	0.0470631	0.235158	0.424559	0.147227	0.00253509		0.571745	0.130913	0.0825369	0.534857	0.625106	0.664341	0.333072	0.356275	0.121746	0.542148	0.0517234	0.0501336
	g_Sutterella	Correlation coefficient	0.302941	-0.482353	0.176471	-0.285294	0.0558824	0.429412	-0.208824	0.152941	1	-0.308824	-0.158824	-0.426471	.588*	.706**	-0.302941	0.414706	0.0441176	-0.0352941	0.1	0.461765
		p-value	0.254067	0.058459	0.513251	0.284139	0.837137	0.0969365	0.437659	0.571745		0.244499	0.556861	0.0994991	0.0165397	0.0022459	0.254067	0.110229	0.871122	0.896753	0.712516	0.0717684
	g_Muribaculaceae	Correlation coefficient	-.615*	.515*	-.779***	.888***	-0.297059	-0.141176	0.191176	0.394118	-0.308824	1	.891***	0.264706	-.659**	-0.417647	0.132353	0.208824	-0.385294	0.0470588	0.188235	0.147059
		p-value	0.0112795	0.0413458	0.00037168	4.32625e-06	0.263863	0.602003	0.478164	0.130913	0.244499		3.61865e-06	0.321804	0.00551142	0.107474	0.625106	0.437659	0.140544	0.862604	0.485087	0.586793
	f_Lachnospiraceae;g_	Correlation coefficient	-.641**	.503*	-.597*	.809***	-0.129412	-0.0382353	0.347059	0.447059	-0.158824	.891***	1	0.173529	-.521*	-0.302941	0.0676471	0.358824	-0.205882	0.135294	0.117647	0.170588
		p-value	0.00743442	0.0470631	0.0146097	0.000148476	0.632882	0.888198	0.187834	0.0825369	0.556861	3.61865e-06		0.520408	0.0386909	0.254067	0.80342	0.172304	0.444285	0.617367	0.664341	0.52761
	g_Blautia	Correlation coefficient	-0.370588	0.144118	-0.102941	0.188235	.553*	-0.105882	0.452941	0.167647	-0.426471	0.264706	0.173529	1	-0.05	0.0441176	0.123529	-0.311765	0.0117647	0.329412	0.282353	0.144118
		p-value	0.15765	0.594378	0.70441	0.485087	0.0263145	0.696334	0.0780987	0.534857	0.0994991	0.321804	0.520408		0.8541	0.871122	0.648542	0.2398	0.965508	0.212801	0.28935	0.594378
	f_Oscillospiraceae;g_UCG-002	Correlation coefficient	0.455882	-.615*	.606*	-.759**	.565*	0.229412	-0.15	-0.132353	.588*	-.659**	-.521*	-0.05	1	.656**	-0.441176	0.197059	0.408824	0.255882	-0.147059	0.0382353
		p-value	0.0759455	0.0112795	0.0128603	0.00065403	0.0226632	0.39272	0.579249	0.625106	0.0165397	0.00551142	0.0386909	0.8541		0.00580074	0.0871536	0.464464	0.115888	0.33879	0.586793	0.888198
	g_Subdoligranulum	Correlation coefficient	0.255882	-0.441176	0.479412	-.503*	0.467647	.585*	0.00294118	0.117647	.706**	-0.417647	-0.302941	0.0441176	.656**	1	0.0735294	0.391176	0.217647	0.367647	0.317647	0.370588
		p-value	0.33879	0.0871536	0.0602393	0.0470631	0.0677609	0.0172253	0.991375	0.664341	0.0022459	0.107474	0.254067	0.871122	0.00580074		0.786679	0.134071	0.418087	0.161232	0.230573	0.15765
	g_Ruminococcus	Correlation coefficient	-0.2	0.179412	0.0558824	0.214706	0.102941	-0.00882353	-0.0882353	-0.258824	-0.302941	0.132353	0.0676471	0.123529	-0.441176	0.0735294	1	0.0970588	-0.00294118	0.238235	0.123529	-0.226471
		p-value	0.457688	0.50614	0.837137	0.424559	0.70441	0.974128	0.745222	0.333072	0.254067	0.625106	0.80342	0.648542	0.0871536	0.786679		0.720651	0.991375	0.374254	0.648542	0.398983
	g_Roseburia	Correlation coefficient	-0.117647	0.138235	-0.0147059	0.0676471	-0.0117647	0.361765	-0.0911765	0.247059	0.414706	0.208824	0.358824	-0.311765	0.197059	0.391176	0.0970588	1	0.0735294	0.238235	0.167647	0.15
		p-value	0.664341	0.609666	0.956892	0.80342	0.965508	0.168559	0.737005	0.356275	0.110229	0.437659	0.172304	0.2398	0.464464	0.134071	0.720651		0.786679	0.374254	0.534857	0.579249
	g_[Eubacterium] eligenes group	Correlation coefficient	0.2	-0.1	.744**	-0.494118	0.405882	0.214706	-0.232353	-0.402941	0.0441176	-0.385294	-0.205882	0.0117647	0.408824	0.217647	-0.00294118	0.0735294	1	0.15	-0.3	-0.226471
		p-value	0.457688	0.712516	0.000948283	0.0517234	0.118792	0.424559	0.386511	0.121746	0.871122	0.140544	0.444285	0.965508	0.115888	0.418087	0.991375	0.786679		0.579249	0.258936	0.398983
	g_[Eubacterium] coprostanoligenes group	Correlation coefficient	0	-0.232353	0.135294	-0.0558824	0.455882	0.176471	0.1	0.164706	-0.0352941	0.0470588	0.135294	0.329412	0.255882	0.367647	0.238235	0.238235	0.15	1	-0.197059	-0.194118
		p-value	1	0.386511	0.617367	0.837137	0.0759455	0.513251	0.712516	0.542148	0.896753	0.862604	0.617367	0.212801	0.33879	0.161232	0.374254	0.374254	0.579249		0.464464	0.47129
	g_Alistipes	Correlation coefficient	-0.326471	0.435294	-0.255882	0.164706	-0.120588	.571*	0.473529	0.494118	0.1	0.188235	0.117647	0.282353	-0.147059	0.317647	0.123529	0.167647	-0.3	-0.197059	1	.774***
		p-value	0.217159	0.0919524	0.33879	0.542148	0.656425	0.0209907	0.0639191	0.0517234	0.712516	0.485087	0.664341	0.28935	0.586793	0.230573	0.648542	0.534857	0.258936	0.464464		0.000439356
	g_Collinsella	Correlation coefficient	-0.388235	0.291176	-0.270588	0.170588	-0.15	.644**	0.270588	0.497059	0.461765	0.147059	0.170588	0.144118	0.0382353	0.370588	-0.226471	0.15	-0.226471	-0.194118	.774***	1
		p-value	0.137282	0.273887	0.310761	0.52761	0.579249	0.00708152	0.310761	0.0501336	0.0717684	0.586793	0.52761	0.594378	0.888198	0.15765	0.398983	0.579249	0.398983	0.47129	0.000439356
	*, Correlation is significant at the 0.05 level (2-tailed).
	**, Correlation is significant at the 0.01 level (2-tailed).
	***, Correlation is significant at the 0.001 level (2-tailed).
	Abbreviations: g, genus; TMP-SMX, trimethoprim-sulfamethoxazole
