# Supplementary material for: Gut Microbiota-Mediated Pharmacokinetic Drug–Drug Interactions between Mycophenolic Acid and Trimethoprim-Sulfamethoxazole in Humans
Source: Pharmaceutics. 2023 Jun 14;15(6):1734. doi: 10.3390/pharmaceutics15061734 (PMC10304707; doi:10.3390/pharmaceutics15061734)
Supplement: Supplementary file 1 [file pharmaceutics-15-01734-s001.zip › Table S5.xlsx]

## Sheet: Table S5
Table S5. Correlation analysis between the bacterial abundance ratio of post-TMP-SMX treatment to pretreatment and the pharmacokinetic parameter ratio of the second period (MMF + TMP-SMX) to the first period (MMF alone)
		MPA									MPAG
		Cmax (µg/mL)	Tmax (h)	AUC0-6 (µg·h/mL)	AUC6-12 (µg·h/mL)	AUC0-12 (µg·h/mL)	AUC0-∞ (µg·h/mL)	Vz/F (L)	t½ (h)	CL/F (L/h)	Cmax (µg/mL)	Tmax (h)	AUC0-6 (µg·h/mL)	AUC6-12 (µg·h/mL)	AUC0-12 (µg·h/mL)	AUC0-∞ (µg·h/mL)	Vz/F (L)	t½ (h)	CL/F (L/h)
g_Bacteroides	Correlation coefficient	0.376471	-0.0458622	0.223529	0.674**	0.3	0.515*	0.155882	0.429412	-0.515*	0.320588	-0.512*	0.0617647	-0.185294	-0.0735294	-0.553*	-0.105882	-0.647**	0.553*
	p-value	0.150648	0.866068	0.405298	0.00423274	0.258936	0.0413458	0.564282	0.0969365	0.0413458	0.226045	0.0426704	0.820242	0.492057	0.786679	0.0263145	0.696334	0.00674208	0.0263145
g_Prevotella	Correlation coefficient	-0.173529	0.204008	-0.208824	0.332353	-0.202941	-0.0529412	0.0941176	0.0411765	0.0529412	0.0735294	0.0166096	0.0147059	0.126471	0.117647	-0.267647	-0.276471	-0.414706	0.267647
	p-value	0.520408	0.448534	0.437659	0.2085	0.450961	0.84561	0.728814	0.879654	0.84561	0.786679	0.951317	0.956892	0.640694	0.664341	0.316254	0.299942	0.110229	0.316254
g_Faecalibacterium	Correlation coefficient	-0.00882353	0.419086	-0.117647	-0.176471	-0.182353	-0.194118	-0.0176471	-0.205882	0.194118	-0.273529	0.0815379	-0.282353	-0.238235	-0.238235	-0.202941	0.402941	0.397059	0.202941
	p-value	0.974128	0.106144	0.664341	0.513251	0.499075	0.47129	0.94828	0.444285	0.47129	0.305323	0.764029	0.28935	0.374254	0.374254	0.450961	0.121746	0.127806	0.450961
g_Parabacteroides	Correlation coefficient	0.426471	0.300476	0.25	0.3	0.288235	0.294118	-0.0617647	-0.0235294	-0.294118	0.335294	-0.237064	0.144118	-0.126471	0.0352941	-0.305882	0.0235294	-0.202941	0.305882
	p-value	0.0994991	0.258144	0.350391	0.258936	0.278984	0.268847	0.820242	0.931074	0.268847	0.204255	0.376678	0.594378	0.640694	0.896753	0.249254	0.931074	0.450961	0.249254
g_Bifidobacterium	Correlation coefficient	-0.0264706	0.603*	-0.0735294	0.194118	-0.111765	-0.126471	0.0411765	-0.126471	0.126471	0.129412	0.303502	0.135294	0.164706	0.188235	0.114706	-0.161765	0.102941	-0.114706
	p-value	0.922481	0.0135036	0.786679	0.47129	0.680274	0.640694	0.879654	0.640694	0.640694	0.632882	0.253145	0.617367	0.542148	0.485087	0.672291	0.549483	0.70441	0.672291
g_Clostridia UCG-014	Correlation coefficient	0.202941	-0.101213	0.235294	0.135294	0.270588	0.329412	-0.332353	-0.120588	-0.329412	-0.491176	-0.0422789	-0.479412	-0.397059	-0.515*	-0.0264706	0.621*	0.529*	0.0264706
	p-value	0.450961	0.709169	0.380356	0.617367	0.310761	0.212801	0.2085	0.656425	0.212801	0.0533504	0.876454	0.0602393	0.127806	0.0413458	0.922481	0.0103135	0.034952	0.922481
g_Agathobacter	Correlation coefficient	-0.132353	0.197682	-0.0941176	-0.302941	-0.205882	-0.329412	-0.155882	-0.291176	0.329412	-0.341176	0.170626	-0.252941	0.0470588	-0.123529	0.0235294	0.220588	0.344118	-0.0235294
	p-value	0.625106	0.463025	0.728814	0.254067	0.444285	0.212801	0.564282	0.273887	0.212801	0.195933	0.527518	0.344563	0.862604	0.648542	0.931074	0.411666	0.191856	0.931074
g_Megamonas	Correlation coefficient	0.238235	0.316291	0.117647	0.0970588	0.138235	0.0323529	-0.379412	-0.402941	-0.0323529	-0.111765	0.131367	-0.138235	0.0558824	-0.0382353	0.25	0.197059	0.388235	-0.25
	p-value	0.374254	0.23268	0.664341	0.720651	0.609666	0.90532	0.147227	0.121746	0.90532	0.680274	0.62771	0.609666	0.837137	0.888198	0.350391	0.464464	0.137282	0.350391
g_Muribaculaceae	Correlation coefficient	0.158824	-0.161308	0.1	0.314706	0.155882	0.341176	-0.0617647	0.0882353	-0.341176	-0.541*	-0.238574	-0.524*	-0.662**	-0.700**	-0.491176	0.632**	0.191176	0.491176
	p-value	0.556861	0.550625	0.712516	0.235158	0.564282	0.195933	0.820242	0.745222	0.195933	0.0304002	0.373555	0.0374126	0.00523375	0.00253509	0.0533504	0.00857758	0.478164	0.0533504
g_Sutterella	Correlation coefficient	0.329412	0.0680026	0.294118	0.191176	0.25	0.311765	0.0205882	0.217647	-0.311765	0.208824	-0.187235	0.0705882	-0.0647059	-0.0176471	-0.229412	-0.108824	-0.214706	0.229412
	p-value	0.212801	0.802406	0.268847	0.478164	0.350391	0.2398	0.939674	0.418087	0.2398	0.437659	0.487452	0.795039	0.811821	0.94828	0.39272	0.688288	0.424559	0.39272
f_Lachnospiraceae;g_	Correlation coefficient	0.114706	0.00316291	0.138235	0.2	0.123529	0.164706	-0.270588	-0.108824	-0.164706	-0.491176	-0.132877	-0.476471	-0.376471	-0.544*	-0.208824	0.618*	0.411765	0.208824
	p-value	0.672291	0.990725	0.609666	0.457688	0.648542	0.542148	0.310761	0.688288	0.542148	0.0533504	0.623726	0.0620592	0.150648	0.0293363	0.437659	0.010788	0.113034	0.437659
g_Blautia	Correlation coefficient	0.3	0.535*	0.302941	-0.0323529	0.223529	-0.0323529	-0.482353	-0.518*	0.0323529	0.25	0.117777	0.241176	0.202941	0.241176	0.117647	0.0441176	0.232353	-0.117647
	p-value	0.258936	0.0329117	0.254067	0.90532	0.405298	0.90532	0.058459	0.0400018	0.90532	0.350391	0.663991	0.368207	0.450961	0.368207	0.664341	0.871122	0.386511	0.664341
g_Alistipes	Correlation coefficient	0.241176	0.352664	0.188235	-0.214706	0.0764706	-0.0823529	-0.297059	-0.391176	0.0823529	-0.0235294	-0.0150996	-0.05	-0.132353	-0.0911765	-0.141176	0.273529	0.276471	0.141176
	p-value	0.368207	0.180324	0.485087	0.424559	0.778341	0.761733	0.263863	0.134071	0.761733	0.931074	0.955739	0.8541	0.625106	0.737005	0.602003	0.305323	0.299942	0.602003
g_Roseburia	Correlation coefficient	0.217647	0.00158146	0.241176	0.129412	0.194118	0.211765	-0.147059	0.0676471	-0.211765	-0.138235	-0.292932	-0.191176	-0.205882	-0.25	-0.382353	0.291176	-0.0470588	0.382353
	p-value	0.418087	0.995362	0.368207	0.632882	0.47129	0.431083	0.586793	0.80342	0.431083	0.609666	0.270871	0.478164	0.444285	0.350391	0.143859	0.273887	0.862604	0.143859
g_Subdoligranulum	Correlation coefficient	0.332353	0.281499	0.2	0.344118	0.202941	0.232353	0.0558824	0.108824	-0.232353	0.532*	-0.0815379	0.361765	0.0882353	0.279412	-0.264706	-0.308824	-0.45	0.264706
	p-value	0.2085	0.290873	0.457688	0.191856	0.450961	0.386511	0.837137	0.688288	0.386511	0.0337686	0.764029	0.168559	0.745222	0.294618	0.321804	0.244499	0.0802957	0.321804
f_Oscillospiraceae;g_UCG-002	Correlation coefficient	0.0794118	0.137587	0.329412	0.235294	0.314706	0.220588	-0.0441176	0.0823529	-0.220588	0.0823529	-0.221964	0.173529	0.105882	0.0911765	-0.238235	-0.15	-0.338235	0.238235
	p-value	0.770025	0.611361	0.212801	0.380356	0.235158	0.411666	0.871122	0.761733	0.411666	0.761733	0.408681	0.520408	0.696334	0.737005	0.374254	0.579249	0.200066	0.374254
g_[Eubacterium] coprostanoligenes group	Correlation coefficient	0.164706	-0.131261	0.161765	0.515*	0.226471	0.441176	-0.0294118	0.123529	-0.441176	-0.129412	-0.339741	-0.223529	-0.452941	-0.382353	-0.624**	0.241176	-0.302941	0.624**
	p-value	0.542148	0.62799	0.549483	0.0413458	0.398983	0.0871536	0.913896	0.648542	0.0871536	0.632882	0.197942	0.405298	0.0780987	0.143859	0.00985565	0.368207	0.254067	0.00985565
g_[Eubacterium] eligenes group	Correlation coefficient	0.0352941	-0.0300476	0.129412	0.609*	0.188235	0.367647	0.3	0.491176	-0.367647	0.0705882	-0.308032	0.0411765	-0.120588	-0.0970588	-0.585*	-0.126471	-0.600*	0.585*
	p-value	0.896753	0.912041	0.632882	0.0123152	0.485087	0.161232	0.258936	0.0533504	0.161232	0.795039	0.245773	0.879654	0.656425	0.720651	0.0172253	0.640694	0.0140071	0.0172253
g_Collinsella	Correlation coefficient	0.176471	0.568*	0.00588235	0.0617647	-0.0264706	-0.0735294	0.0176471	-0.141176	0.0735294	0.202941	0.208375	0.123529	0.0647059	0.135294	0.0794118	-0.0529412	0.179412	-0.0794118
	p-value	0.513251	0.0217875	0.982751	0.820242	0.922481	0.786679	0.94828	0.602003	0.786679	0.450961	0.438667	0.648542	0.811821	0.617367	0.770025	0.84561	0.50614	0.770025
g_Ruminococcus	Correlation coefficient	0.329412	-0.309965	0.238235	0.261765	0.311765	0.529*	-0.141176	0.108824	-0.529*	-0.452941	-0.341251	-0.562*	-0.665**	-0.676**	-0.479412	0.609*	0.138235	0.479412
	p-value	0.212801	0.242668	0.374254	0.32741	0.2398	0.034952	0.602003	0.688288	0.034952	0.0780987	0.195828	0.023537	0.00496739	0.00400825	0.0602393	0.0123152	0.609666	0.0602393
*. Correlation is significant at the 0.05 level (2-tailed).
**. Correlation is significant at the 0.01 level (2-tailed).
Abbreviations: AUC, area under the concentration-time curve (with pre-specified time points); AUC0-∞, AUC from time 0 to infinity; CL/F, apparent clearance; Cmax, maximum concentration; g, genus; MMF, mycophenolate mofetil; MPA, mycophenolic acid; MPAG, mycophenolic acid-7-O-glucuronide; t1/2, terminal elimination half-life; Tmax, time to reach maximum concentration; TMP-SMX, trimethoprim-sulfame…
